## CORRECTION

# Correction: Incidence of dengue illness in Mexican people aged 6 months to 50 years old: A prospective cohort study conducted in Jalisco

The *PLOS ONE* Staff

## Notice of republication

An incorrect version of S1 and S2 Appendices were published in error. The publisher apologizes for this error. This article was republished on May 14, 2021 to correct for this error. Please download this article again to view the correct version.

## Reference

1. DeAntonio R, Amaya Tapia G, Ibarra-Nieto G, Huerta G, Damaso S, Guignard A, et al. (2021) Incidence of dengue illness in Mexican people aged 6 months to 50 years old: A prospective cohort study conducted in Jalisco. *PLoS ONE* 16(5): e0250253. <https://doi.org/10.1371/journal.pone.0250253> PMID: [33951076](https://pubmed.ncbi.nlm.nih.gov/33951076/)

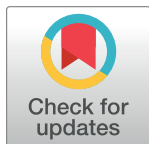

## OPEN ACCESS

**Citation:** The *PLOS ONE* Staff (2021) Correction: Incidence of dengue illness in Mexican people aged 6 months to 50 years old: A prospective cohort study conducted in Jalisco. *PLoS ONE* 16(5): e0252636. <https://doi.org/10.1371/journal.pone.0252636>

**Published:** May 27, 2021

**Copyright:** © 2021 The PLOS ONE Staff. This is an open access article distributed under the terms of the [Creative Commons Attribution License](https://creativecommons.org/licenses/by/4.0/), which permits unrestricted use, distribution, and reproduction in any medium, provided the original author and source are credited.
